1 Article

# 2 Chitozyme: First Peroxidase-like Activity of Chitosan 3 for Multiplexed Visual Detection of H<sub>2</sub>O<sub>2</sub>, Glucose 4 and Lactate on Paper-based Device

5 Syed Rahin Ahmed<sup>1</sup>, Xuan Weng<sup>1</sup> and Suresh Neethirajan<sup>1,\*</sup>

6 <sup>1</sup>BioNano Laboratory, School of Engineering, University of Guelph, Guelph, ON N1G 2W1

7 \* Correspondence: sneethir@uoguelph.ca; Tel.: +1-519-824-4120

8 Academic Editor: name

9 Received: date; Accepted: date; Published: date

10 **Abstract:** Visual read-out diagnostics tools are promising candidates for field applicable medical  
11 devices. Current colorimetric biosensors require introduction of natural enzymes or nanozymes,  
12 which has some serious drawbacks for practical applications. Chitosan, a natural polymer,  
13 provides safe and efficient compound in medical and pharmaceutical technology. Herein, we  
14 report on a simple, cost-efficient, field-portable, environmental friendly and ultra-sensitive  
15 multiplex detection platform based on peroxidase-like activity of chitosan in the presence of  
16 3,3',5,5'-Tetramethylbenzidine (TMBZ) and H<sub>2</sub>O<sub>2</sub>. This straight forward signal amplification  
17 strategy was successfully applied to detect H<sub>2</sub>O<sub>2</sub>, glucose and lactate with the limit of detection  
18 (LOD) of 2.64 pM, 0.104 μM and 2.8 nM respectively, represents the lowest LOD of H<sub>2</sub>O<sub>2</sub>, glucose  
19 and lactate with visual read-out. The chitosan-based assay performance was also retained in  
20 complex biological media for glucose and lactate detection. Furthermore, the proposed assay was  
21 successfully demonstrated as a paper-based colorimetric biosensor. Most importantly, the  
22 simplicity, biocompatibility and sensitivity of the proposed assay will open new doors for  
23 instrument free naked eye visual detection of H<sub>2</sub>O<sub>2</sub>, glucose and lactate detection.

24 **Keywords:** Chitozyme; Hydrogen peroxide; paper biosensor; lactate; glucose

25

---

## 26 1. Introduction

27 Instrument free point of care diagnostic tools has high potential to provide a simple, cheap and  
28 easy-accessible device for medical applications. A key example of such device is colorimetric read  
29 out strategy that enable the development of low-cost diagnostics to detect analytes visually [1-5].  
30 Over the last few decades, conventional enzymes i.e., horseradish peroxidase (HRP), alkaline  
31 phosphate (ALP) have been used for visual color amplification. However, their denaturation  
32 behaviour at high temperature, pH stability and high cost limits their use in real life applications.<sup>2</sup>  
33 Recently, researchers are attempting to replace natural enzymes with nanomaterials (known as  
34 nanozymes) to overcome the aforementioned problems; and few nanomaterials delivered as  
35 promising candidates of this class for various applications [6-8]. Up-to-date, although much efforts  
36 have been given on nanomaterials based artificial enzyme developments, their aggregation  
37 problems in different chemical environments; monodispersibility; uniform size preparation and  
38 toxicological implications are major concerns in the practical applications for in-vitro or in-vivo  
39 detection of analytes.

40 Introducing a new diagnostic tool that is easy-to-operate, containing non-toxic chemicals and  
41 ability to detect extremely small analyte concentrations with enhanced superior visual color would  
42 enable the development of low-cost commercially viable technologies for medical applications. In  
43 view of above discussions, here we propose to amplify the visual detection using chitosan as a  
44 peroxidase-like enzyme. We proposed the term of our new approach to be “chitozymes”.

45 Chitosan has received lots of research interest because of its structural and broader range of  
46 chemical and physical attributes in fundamental science, applied research, and industrial  
47 biotechnology. For example, chitosan can be used as an advanced biofabrication material; surface  
48 adaptation of cell/protein-integrating biological systems; and enzyme surface immobilization in  
49 preparation of medical sensing devices [9,10]. Chitosan has benefits of natural availability as well  
50 as biocompatibility, brings it as a potential candidate to the creation of chitosan-based analytical  
51 tools for point-of-care clinical, biotechnological, and environmental analysis. Recently, the  
52 integration of chitosan with nanomaterials was reported as a peroxidase-like activity for visual  
53 sensing application [11,12]. However, up-to-now, no reports on bare chitosan as a peroxidase-like  
54 enzymatic activity has been published yet. Hence, here for the first time, we present peroxidase-like  
55 activity of chitosan for rapid ultrasensitive detection of  $H_2O_2$ , glucose and lactate. This approach will  
56 diminish the requirements of others material to integrate with chitosan for sensing applications as  
57 well as reduce the cost, labour and multi-step preparative process.

58 Positively charged gold nanoparticles (Au NPs) exhibits higher peroxidase activity in  
59 comparison to negatively charged Au NPs [13]. The surface charge of nanoparticles plays a crucial  
60 role in influencing the peroxidase-like activity. Hence, we targeted three positively charged  
61 chemicals i.e., Cetyl trimethylammonium bromide (CTAB), Poly-L-Lysine (PLL) and chitosan to  
62 check their enzymatic activity towards TMBZ/ $H_2O_2$ . Our results confirm that chitosan demonstrated  
63 stronger peroxidase-like activity in comparison to other two chemicals, and allowed us to develop a  
64 portable multiplex system for simultaneous detection of glucose, lactate and  $H_2O_2$ .

65 Chitosan could catalyse the oxidation of the peroxidase substrate TMBZ by  $H_2O_2$  to develop a  
66 blue color in aqueous solution, which could introduce us a new way of visual detection of  $H_2O_2$ . A  
67 sensitive and accurate determination of  $H_2O_2$  is much needed because of its numerous application in  
68 food and pharmaceutical industries, and environmental analysis [14]. In addition,  $H_2O_2$  is produced  
69 by the oxidation of glucose due to catalysis by glucose oxidase (GOD) and the oxidation of lactic acid  
70 catalysed by lactate oxidase (LOD). The proposed sensing mechanism was further extended to  
71 quantitatively analyse glucose and lactic acid in samples. The determination of glucose  
72 concentration at lower limit is essential for medical diagnostic applications such as for diabetic  
73 patients, as well as in industrial applications [15]. The quantitative measurement of lactic acid  
74 concentration in body fluids has importance in clinical assessment to determine the patients with  
75 diabetic coma, bacterial infections and others medical symptoms [16]. Lactate concentration plays a  
76 key parameter in healthcare, food industries and for assessing patient health conditions like  
77 hemorrhage, respiratory failure, hepatic disease, sepsis and tissue hypoxia [17].

78 The creative idea to demonstrate the chitosan-based biosensing assay on a paper-based device  
79 towards detecting  $H_2O_2$ , glucose and lactate would facilitate the pathway for obtaining reliable  
80 healthcare data under non-laboratory conditions at low-cost. Recently, paper-based analytical tools  
81 has gained attractive alternative to highly sophisticated instrumentation for numerous applications.  
82 Paper-based device can be easily printed, coated and impregnated. The cellulose composition in  
83 paper is compatible for proteins and biomolecules; it is as well as environmentally compatible,  
84 easily disposable and accessible almost everywhere. In particular, paper-based biosensor is highly  
85 suitable to point-of-need monitoring in less industrialized countries [18]. Testing of target analytes  
86 would simply involve dropping the solutions (blood or serum or sweat or saliva) on chitosan/TMBZ  
87 treated paper. This concept can promptly inform even nonprofessional users with clear and  
88 unambiguous visual color against target analytes.

89

## 90 2. Materials and Methods

### 91 2.1. Materials

92 Chitosan, poly-L-lysine (PLL), cetyltrimethylammonium bromide (CTAB),  
93 3,3',5,5'-tetramethylbenzidine (TMBZ), hydrogen peroxide ( $H_2O_2$ ), sulfuric acid ( $H_2SO_4$ ), glucose,

94 sucrose, fructose, lactose, galactose, glucose oxidase (GOD from *Aspergillus Niger*), L-Ascorbic acid,  
95 L-(+)-Lactic acid, lactic oxidase (LOD from *Aerococcus Viridans*) and nunc-Immuno 96-well plates  
96 were purchased from Sigma-Aldrich (St. Louis, MO, USA). Maltose and acetic acid were received  
97 from Fisher Scientific Company (New Jersey, USA). All experiments were performed using highly  
98 pure deionized (DI) water ( $>18\text{ M}\Omega\cdot\text{cm}$ ).

#### 99 2.2. Preparation of water-soluble chitosan

100 Chitosan solution was prepared by dissolving 2 mg/mL chitosan in 0.1 M glacial acetic acid at  
101 60°C for 30 min. Once the initial turbid colored solution turned to clear one, stopped the heating and  
102 cool down at room temperature. Prepared solution was stored at room temperature for further  
103 experiments.

#### 104 2.3. Hydrogen peroxide ( $\text{H}_2\text{O}_2$ ) detection using GOD and chitosan

105 Various concentrated solutions of  $\text{H}_2\text{O}_2$  were prepared using PBS buffer prior to the sensing  
106 experiments. Then, 100  $\mu\text{L}$  of each concentrated  $\text{H}_2\text{O}_2$  solutions were placed in 96 well plate and  
107 subsequently, 100  $\mu\text{L}$  of chitosan/TMBZ- $\text{H}_2\text{O}_2$  mixture solution were added in the above solution.  
108 After 30 min, the ultraviolet-visible (UV-vis) spectrum of developed color was recorded using a  
109 Cytation 5 spectrophotometer (BioTek Instruments, Inc., Ontario, Canada).

#### 110 2.4. Glucose detection using GOD and chitosan

111 The experiment for glucose detection was performed as follows: (a) 50  $\mu\text{L}$  of GOD (1 mg  $\text{mL}^{-1}$ )  
112 and 50  $\mu\text{L}$  of different concentrated glucose in PBS buffer solution (pH 7.5) were incubated in 96 well  
113 plates at room temperature for 30 min; (b) Then, 100  $\mu\text{L}$  of chitosan/TMBZ- $\text{H}_2\text{O}_2$  mixture solution  
114 were added in the above solution, and (c) the mixed solution was incubated at room temperature for  
115 30 min and then the ultraviolet-visible (UV-vis) spectrum of developed color was recorded.

#### 116 2.5. Lactic acid detection using LOD and chitosan

117 Lactic acid detection was performed as follows: (a) 50  $\mu\text{L}$  of LOD (1 mg  $\text{mL}^{-1}$ ) and 50  $\mu\text{L}$  of  
118 different concentrated lactic acid in PBS buffer solution (pH 7.5) were incubated in 96 well plate at  
119 room temperature for 30 min; (b) Then, 100  $\mu\text{L}$  of chitosan/TMBZ- $\text{H}_2\text{O}_2$  mixture solution were added  
120 in the above solution, and (c) the mixed solution was incubated at room temperature for 30 min and  
121 then the ultraviolet-visible (UV-vis) spectrum of developed color was recorded.

#### 122 2.6. Preparation of paper-based device

123 Xerox printer (colorQube 8580, Japan) was used to fabricate the paper-based sensing device.  
124 Here, Whatman filter paper (GE Healthcare UK limited, Buckinghamshire, UK) was used due to its  
125 hydrophilic and biocompatible behavior as well as low cost. The fabrication process includes three  
126 steps:

127 1) The desired geometry i.e., Circle, square and rhombus-like shaped was drawn in white  
128 background for  $\text{H}_2\text{O}_2$ , glucose and lactic acid detection respectively by using the software Adobe  
129 Illustrator.

130 2) Printed the wax-paper with circle, square and rhombus-like shaped on the surface by using  
131 the wax printer.

132 3) Melted the wax-printed paper on a hot plate at 175°C for 40 s. The wax covered area will be  
133 hydrophobic, while the area without wax will be hydrophilic (sensing area).

#### 134 2.7. Detection of $\text{H}_2\text{O}_2$ , glucose and lactic acid on paper-based device

135 Printed wax-paper was used to detect  $\text{H}_2\text{O}_2$ , glucose and lactate. Firstly, 5  $\mu\text{L}$  of chitosan  
136 solution (2 mg/mL) was dropped on sensing area (hydrophilic area) for 5 min to dry-up. Then,  
137 various concentrated target solutions (5  $\mu\text{L}$ ) was added on the surface, and color was developed

138 within 10 min. ImageJ software was used to process the pixel value of the detection analyte from the  
139 colored image.

### 140 3. Results and Discussion

141 Firstly, the enzymatic activity of chitosan (1 mg/mL, 20  $\mu$ L), CTAB (1 mg/mL, 20  $\mu$ L) & PLL (1%,  
142 20  $\mu$ L) were examined with 1 mL of mixture solution of peroxidase substrate TMBZ (5 mM) and  
143 H<sub>2</sub>O<sub>2</sub> (10 mM) separately for 5 min (Fig. 1A). A strong blue color was developed for chitosan whereas  
144 the blue color developed with CTAB was not so significant in comparison to chitosan. No enzymatic  
145 change of color was observed for PLL during the reaction time (Fig. 1B). The absorbance peak of  
146 resulting blue solution was located at 660 nm due to the oxidation of TMBZ.

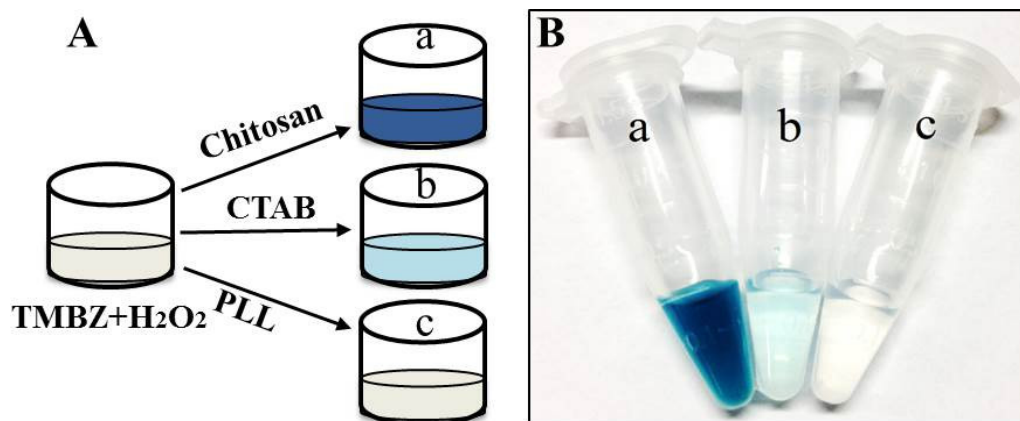

147

148 **Figure 1.** The catalytic activity of chitosan, CTAB and PLL: (A) schematic presentation of the  
149 sensing experiment; (B) naked eye image of the experimental results.

150 The viability of the sensing assay was performed with different kinds of reaction mixtures i.e. a)  
151 chitosan/TMBZ- H<sub>2</sub>O<sub>2</sub>; b) chitosan/TMBZ; c) chitosan/H<sub>2</sub>O<sub>2</sub>; d) TMBZ-H<sub>2</sub>O<sub>2</sub>/CH<sub>3</sub>COOH and e)  
152 chitosan/CH<sub>3</sub>COOH. As shown in Figure 2A, it was clearly observed with the naked eye that a deep  
153 blue colored solution was developed by the reaction of chitosan and TMBZ-H<sub>2</sub>O<sub>2</sub> complex (Fig.  
154 2A-a). However, none of the other mixtures showed characteristic blue color during reaction (Fig.  
155 2A- b, c,d,e). Here, the viability test of acetic acid (CH<sub>3</sub>COOH) was confirmed since it was used to  
156 dissolve chitosan. Spectroscopic study of colored solutions revealed a significant enhanced spectrum  
157 peak centered at 660 nm compared to other solutions (Fig. 2B). The control experiments confirmed  
158 that the glacial acetic acid did not affect the peroxidase-like activity of chitosan, and it is specific only  
159 in the presence of TMBZ-H<sub>2</sub>O<sub>2</sub> complex.

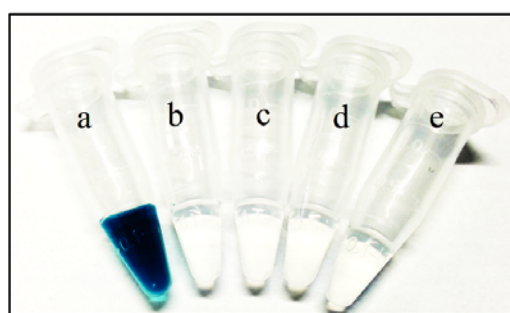

a: Chitosan+TMBZ-H<sub>2</sub>O<sub>2</sub>; b: Chitosan+TMBZ  
c: Chitosan+H<sub>2</sub>O<sub>2</sub>; d: TMBZ-H<sub>2</sub>O<sub>2</sub>+CH<sub>3</sub>COOH  
e: Chitosan+CH<sub>3</sub>COOH

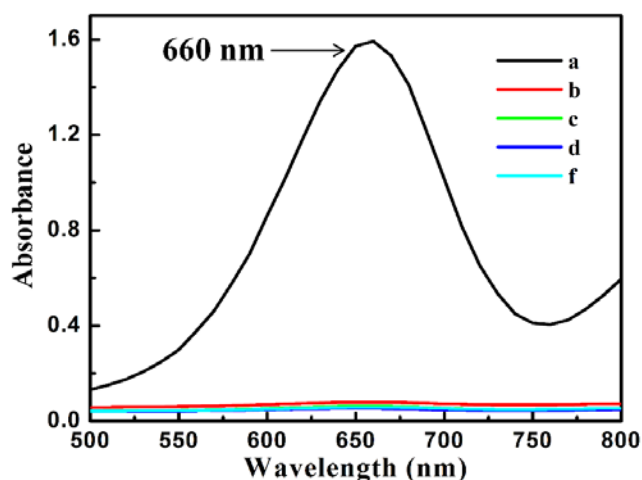

160

161 **Figure 2.** The viability of the developed sensing assay: (A) visual color of the experimental results  
162 with different mixtures; (B) Absorbance of the corresponding mixture solutions.

163 The optimal conditions for catalytic activity of chitosan was examined with several parameters,  
164 such as concentration, pH, TMBZ concentration, H<sub>2</sub>O<sub>2</sub> concentration and reaction time. These  
165 parameters may significantly affect the enzymatic activities of chitosan. The concentration of  
166 chitosan has significant effect on enzymatic reaction. Experimental studies on different concentrated  
167 chitosan showed that the intense blue color was observed with concentration of 2 mg/mL (Fig. S1).  
168 The pH effect on the enzymatic activity of chitosan was studied in the range of pH 1–12. Results  
169 revealed that the catalytic activity of chitosan increased with increasing the pH up to 4, then sharply  
170 decreased with increasing pH values (Fig. S2A). The reaction time to get maximum catalytic activity  
171 was investigated from 0 to 20 min (Fig. S2B). The optical density of blue color generated through  
172 catalytic activity of chitosan was observed to be a maximum within 9 min, after that, it's became  
173 steady. The optimum concentration of H<sub>2</sub>O<sub>2</sub> and TMBZ were also checked at 0 to 20 mM, and 1 to 10  
174 mM respectively. The highest peroxidase-like activities of chitosan were observed with the  
175 concentration of 10 mM and 5 mM of H<sub>2</sub>O<sub>2</sub> and TMBZ respectively (Fig. S2C and S2D). All the  
176 reactions were carried out at room temperature which is a convenient for sensing applications.

177 The enzymatic activity of chitosan depends on H<sub>2</sub>O<sub>2</sub> concentration in the presence of TMBZ. The  
178 proposed method was applied to detect H<sub>2</sub>O<sub>2</sub>, and the optical density of experimental results  
179 increased with increasing H<sub>2</sub>O<sub>2</sub> concentration (Fig. 3A). The calibration graph of the optical density  
180 at 660 nm versus H<sub>2</sub>O<sub>2</sub> concentration showed linearity in the range of 10 pM to 1 mM with a  
181 detection limit of 2.64 pM (Fig. 3A).

182 In addition, the catalytic reaction of chitosan is integrated with the reaction between glucose  
183 and GOD for quantitative measurement of glucose concentration (Fig. 4A). The visual detection of  
184 glucose was completed by two steps reaction process i.e., at first, glucose and GOD were reacted in  
185 PBS (pH 7.4) at room temperature for 10 min which produced H<sub>2</sub>O<sub>2</sub>; then the chitosan was added to  
186 detect H<sub>2</sub>O<sub>2</sub> visually. Fig. 4B showed the linear relationship of the absorbance (660 nm) versus  
187 glucose concentration in the range of 0.2-10 μM with the limit of detection of 0.104 μM, which is  
188 lower than any paper reported so far to our best of knowledge. The glucose level for diabetic patient  
189 when fasting glucose is around 4-7 mM. Thus, our proposed glucose sensor is much sensitive than  
190 the practical needs. Several control experiments were also performed to check the specificity of the  
191 proposed method for glucose detection using sucrose, fructose, lactose, galactose and maltose. The  
192 results were investigated and no characteristic peaks were obtained for control experiments (Fig. S3).  
193 Hence, the visual detection method proposed for glucose was highly sensitive and selective. The  
194 naked eye image of glucose detection system is shown in Figure S4. Besides the analysis of glucose in  
195 phosphate buffer, additional experiments were conducted to ability of detecting glucose in complex  
196 biological matrix, such as blood. Results revealed that chitozymes based visual analysis is robust and  
197 selective enough to detect glucose in complex media with limit of detection of 0.23 μM, which is  
198 promising for practical applications (Fig. S5).

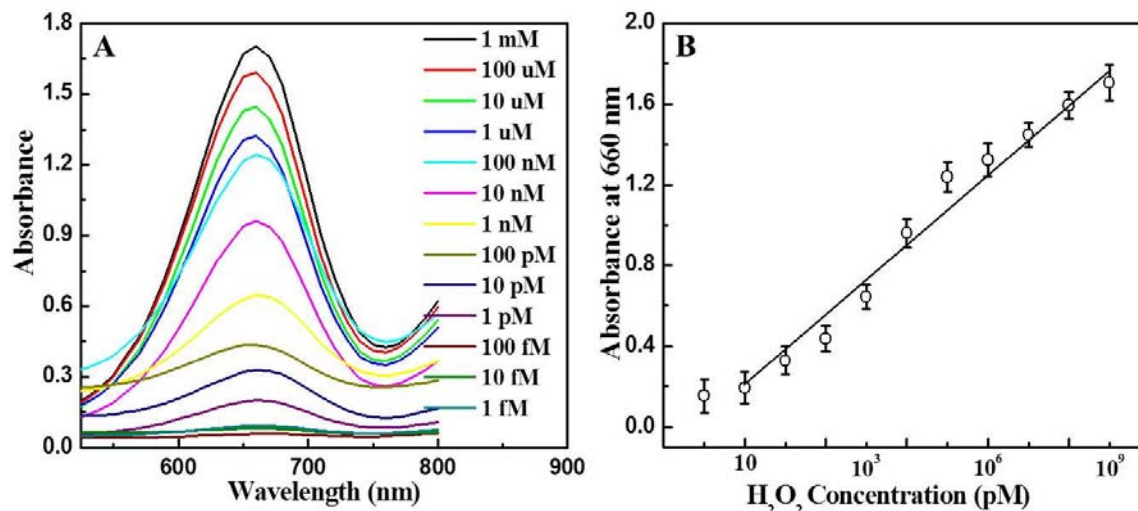

199  
200  
201

**Figure 3.** Experimental results of H<sub>2</sub>O<sub>2</sub> detection: (A) Absorbance spectra of sensing H<sub>2</sub>O<sub>2</sub>; (B) Calibration curve of absorbance Vs H<sub>2</sub>O<sub>2</sub> concentration.

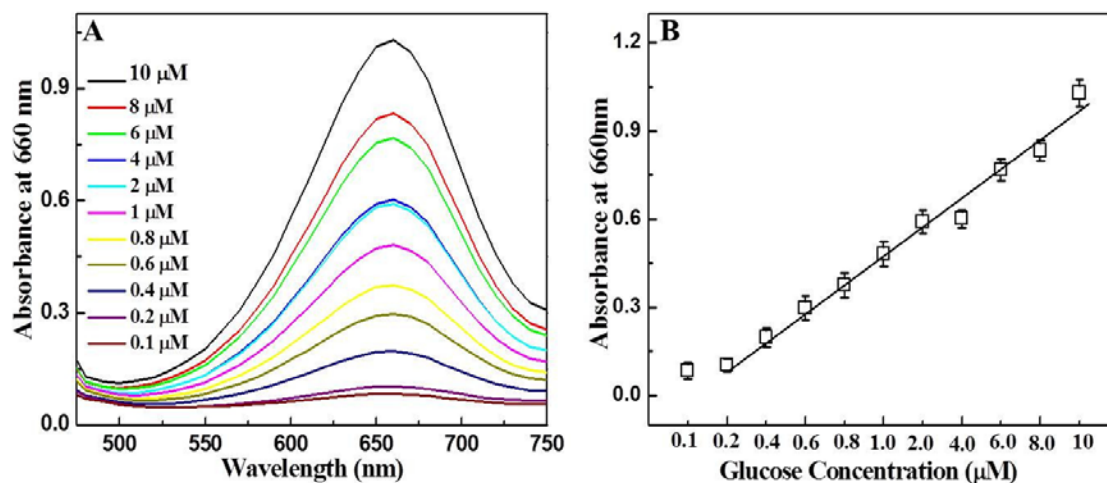

202  
203  
204  
205

**Figure 4.** Experimental results of the glucose detection based on the developed Chitozyme biosensing assay: (A) Absorbance spectra of the glucose sensing experiment; (B) Calibration curve of the absorbance Vs glucose concentration.

206 The analytical reliability of the colorimetric measurements for the glucose assay was compared  
207 to the signal recorded in a commercial glucometer (Contour next blood glucose Meter, Japan). The  
208 analysis on the glucometer was carried out by the addition of a small drop of target solution in blood  
209 media on a disposable test strip. The glucose level appears on the meter display is in mM unit. As  
210 shown in Figure S6, commercial glucometer has the capability to detect glucose concentration with  
211 the range of 4-10 mM; whereas the proposed method showed its sensitivity up to μM level.

212 Furthermore, similar two step assay was conducted for lactic acid detection using LOD to  
213 produce H<sub>2</sub>O<sub>2</sub> at the initial step (Fig. 5A). The absorbance of sensing results was linearly correlated  
214 with lactic acid in the range of 10 mM to 10 nM with the limit of detection of 2.8 nM (Fig. 5B). While  
215 lactic acid analysis was performed with commercial milk, detection limit was obtained at 5.3 nM  
216 (Fig. S7). Thus, the developed chitozymes based analysis of lactic acid would be a promising  
217 candidate for practical applications in complex media. A comparison study with others techniques  
218 was also performed based on recently published papers as shown in Table S1& S2. Superiority in  
219 terms of sensitivity of the present study in comparison to other techniques was clearly observed  
220 here.

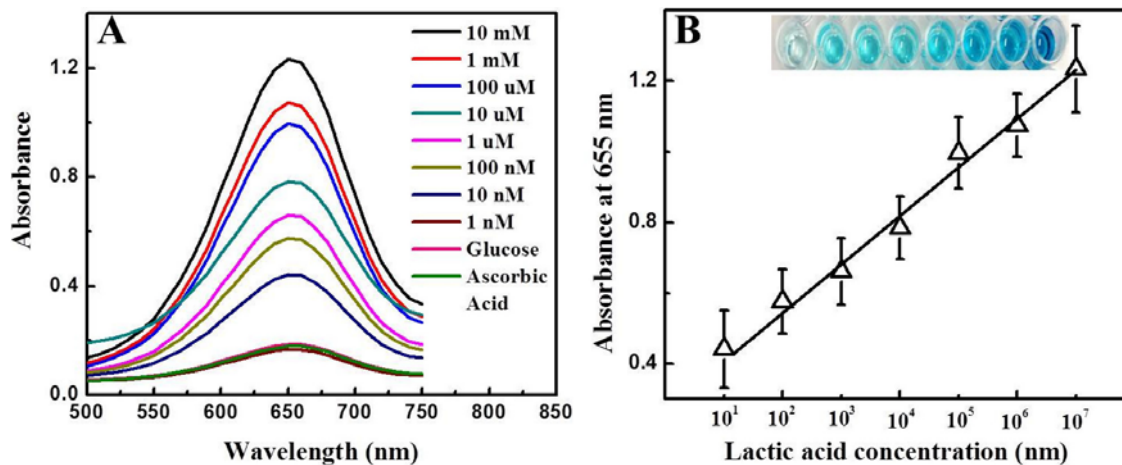

221

222

223

224

**Figure 5.** Experimental results of the lactic acid detection based on the developed chitozyme biosensing assay: (A) Absorbance spectra of the lactic acid sensing (Inset: visual detection image); (B) Calibration curve of the absorbance vs lactic acid concentration.

225

226

227

228

229

230

231

Proposed chitozymes based colorimetric detection method was further demonstrated with paper-based sensor to make it more flexible in real life applications. Paper based disposable devices has been investigated extensively recently due to low-cost and field-portable in remote area applications [19]. Here, paper device was prepared by wax printer with desired geometry. Circle, square and rhombus-like shaped (diameter of 8 mm each) was drawn and printed for  $H_2O_2$ , glucose and lactic acid detection respectively. The bottom part of the paper devices was covered with wax to prevent sample leaking.

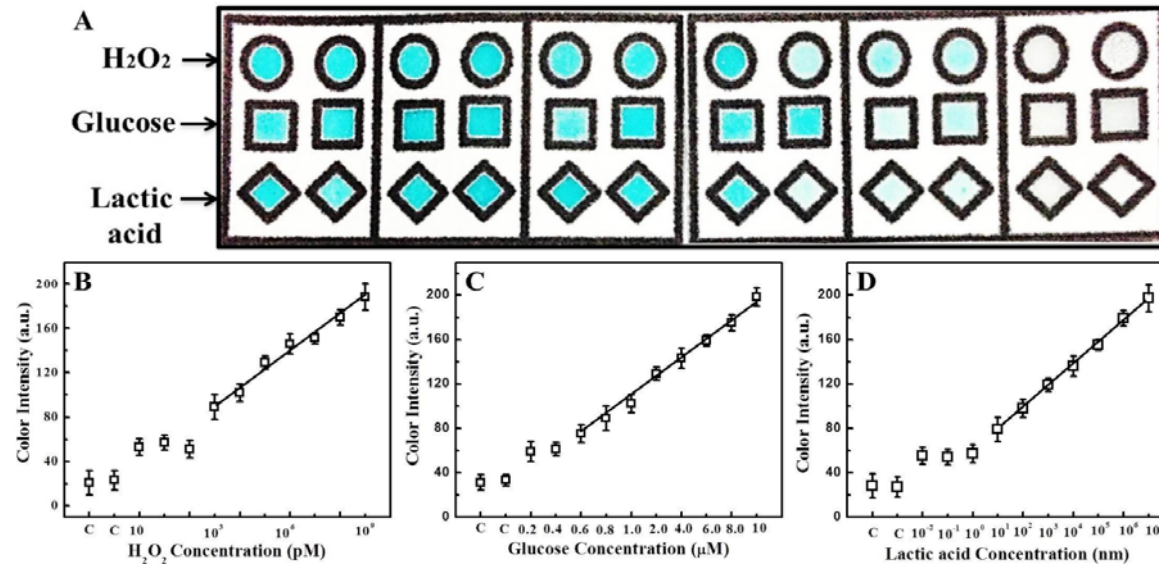

232

233

234

235

236

237

238

**Figure 6.** Experimental results of the chitozyme based paper-based biosensor: (A) Visual detection of  $H_2O_2$ , glucose and lactic acid; (B) Calibration curve of color intensity vs  $H_2O_2$  concentration (C means control experiment with ascorbic acid & glucose); (C) Calibration curve of color intensity vs glucose concentration (C means control experiments with fructose & sucrose); (D) Calibration curve of color intensity vs lactic acid concentration (C means control experiments with ascorbic acid & glucose).

239

240

241

The desired detection zone on printed wax paper device was initially modified with chitosan solution (5  $\mu$ L) and allowed to dry at room temperature for 10 min. Then, the detection zone was spotted with different concentrated  $H_2O_2$ , mixture containing different concentrated glucose and

242 GOx; mixture containing different concentrated lactic acid and LOD prepared in PBS buffer solution  
243 (pH 7.5) separately. Visual image of detections on paper-based device is shown in Figure 6A. The  
244 linear concentration range for H<sub>2</sub>O<sub>2</sub> detection was 1 mM to 100 nM with the limit of detection of 64.3  
245 nM (Fig. 6B); for glucose detection was 10 μM to 0.6 μM with the limit of detection of 0.46 μM (Fig.  
246 6C) and for lactic acid, the detection was 10 mM to 10 nM with limit of detection 7.9 nM (Fig. 6D).

#### 247 4. Conclusions

248 In conclusion, an user and environment friendly colorimetric read-out assay was introduced  
249 based on peroxidase-like enzymatic activity of chitosan for the first time. This straight forward  
250 signal amplification strategy was successfully applied to detect H<sub>2</sub>O<sub>2</sub>, glucose and lactic acid with  
251 the limit of detection of 2.64 pM, 0.104 μM and 2.8 nM respectively which was the lowest value so far  
252 reported to the best of our knowledge. Proposed assay showed its superiority and practicability in  
253 detecting the target analytes in the complex media. Chitosan-based bioassay was successfully  
254 demonstrated on the paper-based device to make a cheaper and easier medical tool. Because  
255 chitosan is a natural and biocompatible compound, this approach would open a new window in  
256 colorimetric bioassay and catalytic chemistry. The near future will be an exciting period in the  
257 chitosan-based visual biosensor research area.

258 **Supplementary Materials:** The following are available online at [www.mdpi.com/link](http://www.mdpi.com/link), Figure S1-S7, Table S1  
259 and Table S2.

260 **Acknowledgments:** The authors sincerely thank the Natural Sciences and Engineering Research Council of  
261 Canada (400705) for funding this study.

262 **Author Contributions:** SN conceived the study. SRA conducted experiments and collected data. XW helped  
263 with the fabrication of paper based biosensing device. SRA wrote the manuscript with XW. All authors read  
264 and approved the manuscript.

265 **Conflicts of Interest:** The authors declare no conflict of interest.

#### 266 References

- 267 1. Besant JD, Das J, Burgess IB, et al. Ultrasensitive visual read-out of nucleic acids using electrocatalytic  
268 fluid displacement. *Nat Commun.* 2015; 6: 6978.
- 269 2. Xia F, Zuo X, Yang R, et al. Colorimetric detection of DNA, small molecules, proteins, and ions using  
270 unmodified gold nanoparticles and conjugated polyelectrolytes. *Proc Natl Acad Sci USA.* 2010; 107:  
271 10837–10841.
- 272 3. Rica RDL, Stevens MM. Plasmonic ELISA for the ultrasensitive detection of disease biomarkers with the  
273 naked eye. *Nat Nanotechnol.* 2012; 7: 821–824.
- 274 4. Gao Z, Hou L, Xu M, et al. Enhanced Colorimetric Immunoassay Accompanying with Enzyme Cascade  
275 Amplification Strategy for Ultrasensitive Detection of Low-Abundance Protein. *Sci Rep.* 2014; 4: 3966.
- 276 5. Lin Y, Ren J, Qu X. Catalytically Active Nanomaterials: A Promising Candidate for Artificial Enzymes. *Acc*  
277 *Chem Res.* 2014; 47: 1097–1105.
- 278 6. Ahmed SR, Kim J, Tran VT, et al. *In situ* self-assembly of gold nanoparticles on hydrophilic and  
279 hydrophobic substrates for influenza virus-sensing platform. *Sci Rep.* 2017; 7: 44495.
- 280 7. Wei H, Wang E. Nanomaterials with enzyme-like characteristics (nanozymes): next-generation artificial  
281 enzymes. *Chem Soc Rev.* 2013; 42: 6060–6093.
- 282 8. Wang X, Hu Y, Wei H. Nanozymes in bionanotechnology: from sensing to therapeutics and beyond.  
283 *Inorg Chem Front.* 2016; 3: 41–60.
- 284 9. Kumar MNVR, Muzzarelli RAA, Muzzarelli C, et al. Chitosan Chemistry and Pharmaceutical  
285 Perspectives. *Chem Rev.* 2004; 104: 6017–6084.
- 286 10. Suginta W, Khunkaewla P, Schulte A. Electrochemical Biosensor Applications of Polysaccharides Chitin  
287 and Chitosan. *Chem Rev.* 2013; 113: 5458–5479.
- 288 11. Jiang H, Chen Z, Cao H, et al. Peroxidase-like activity of chitosan stabilized silver nanoparticles for  
289 visual and colorimetric detection of glucose. *Analyst.* 2012; 137: 5560–5564.



- 290 12. Chang H, Lv J, Zhang H, et al. Qiao, Photoresponsive colorimetric immunoassay based on chitosan  
291 modified AgI/TiO<sub>2</sub> heterojunction for highly sensitive chloramphenicol detection. *Biosens Bioelectron.*  
292 2017; 87: 579–586.
- 293 13. Jv Y, Li B, Cao R. Positively-charged gold nanoparticles as peroxidase mimic and their application  
294 in hydrogen peroxide and glucose detection. *Chem Commun.* 2010; 46: 8017–8019.
- 295 14. Chen W, Cai S, Ren Q, et al. Recent advances in electrochemical sensing for hydrogen peroxide: a review.  
296 *Analyst.* 2012; 137: 49-58.
- 297 15. Heller A, Feldman B. Electrochemical Glucose Sensors and Their Applications in Diabetes Management.  
298 *Chem Rev.* 2008; 108: 2482–2505.
- 299 16. Pundir CS, Narwal V, Batra B. Determination of lactic acid with special emphasis on biosensing methods:  
300 A review. *Biosens Bioelectron.* 2016; 86: 777–790.
- 301 17. Rathee K, Dhull V, Dhull R, et al. Biosensors based on electrochemical lactate detection: A comprehensive  
302 review. *Biochem Biophys Rep.* 2016; 5: 35–54.
- 303 18. Busa LSA, Mohammadi S, Maeki M, et al. Advances in Microfluidic Paper-Based Analytical Devices for  
304 Food and Water Analysis. *Micromachines.* 2016; 7: 86.
- 305 19. López-Marzoa AM, Merkoçi A. Paper-based sensors and assays: a success of the engineering design and  
306 the convergence of knowledge areas. *Lab Chip.* 2016; 16: 3150- 3176.
